# Supplementary material for: Drug checking services for people who use drugs: a systematic review
Source: PubMed Central journal article supplement — Addiction. 2021 Dec 12;117(3):532–44. doi: 10.1111/add.15734 (PMC9299873; doi:10.1111/add.15734), 2021-12-12
Supplement: ADD-117-532-s003.pdf [file ADD-117-532-s003.pdf]

**Figure 2: Outcome Measures Examined by Included Studies (n=90)**

**Figure 2A. Influence of DCS on Behaviour of PWUD (n=31 studies)**

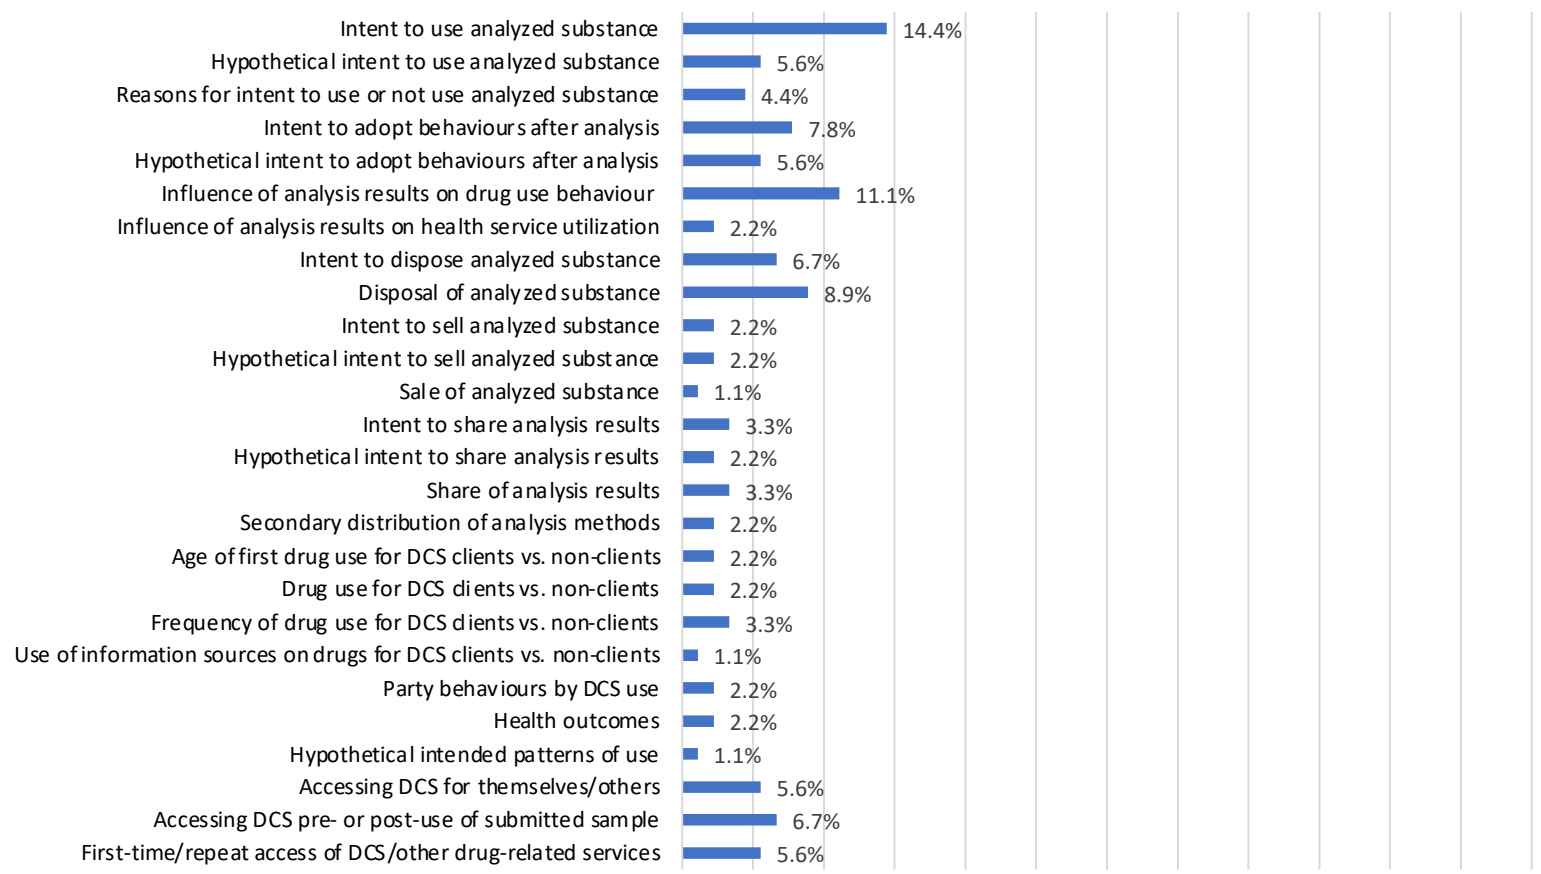

**Figure 2B. Monitoring of Drug Markets by DCS (n=63 studies)**

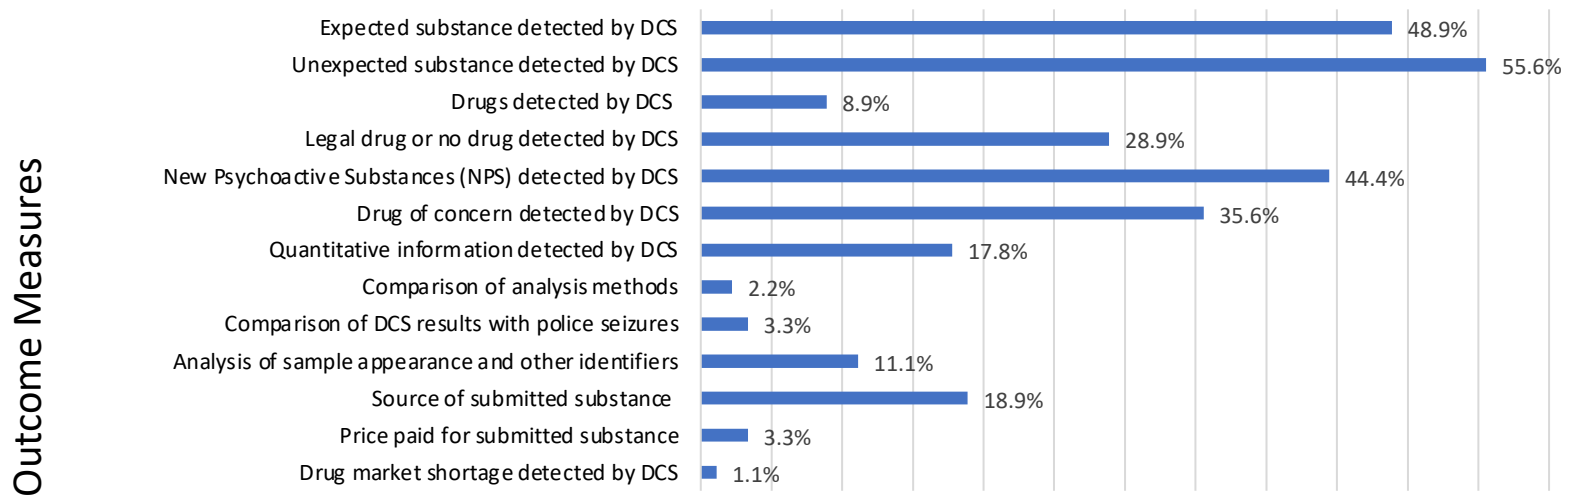

**Figure 2C. Outcomes Related to Models of DCS (n=17 studies)**

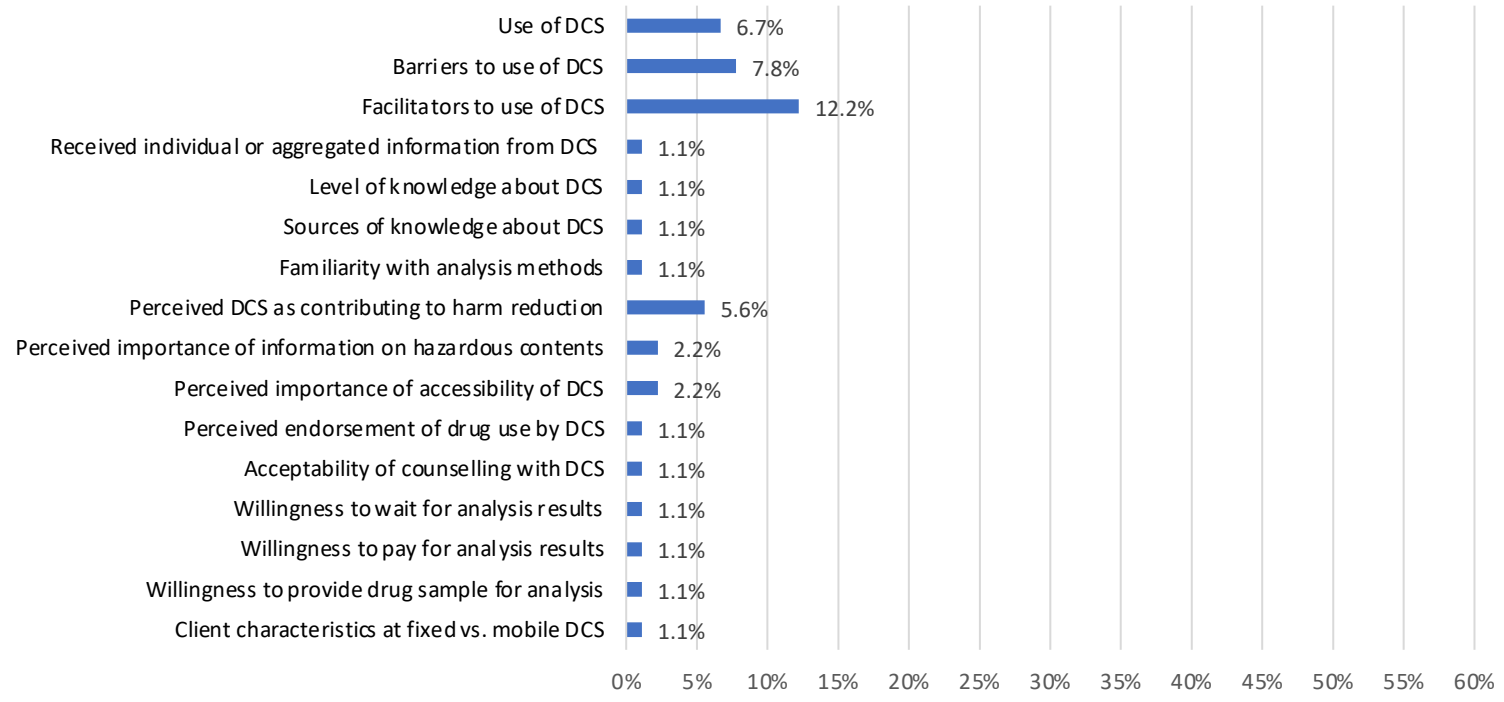

% of Studies (n=90)
